# Supplementary material for: Reactivity of oxidants towards phenyl and benzyl substituted 5-selanylpentanoic acids: radiolytic and theoretical insights
Source: Royal Society of Chemistry journal article supplement (doi:10.1039/d3nj04487d), 2023-11-13
Supplement: d3nj04487d1.pdf [file d3nj04487d1.pdf]

Supporting information

## Reactivity of Oxidants towards Phenyl and Benzyl Substituted 5-Selanylpentanoic Acids: Radiolytic and Theoretical Insights

Beena G. Singh,<sup>1,2\*</sup> Kavanal P. Prasanthkumar,<sup>3</sup> Francesca Mangiavacchi,<sup>4,5</sup> Francesca Marini,<sup>4</sup> Claudio Santi<sup>4\*</sup>

<sup>1</sup> Radiation & Photochemistry Division, Bhabha Atomic Research Centre, Trombay, Mumbai – 4000851; beenam@barc.gov.in (ORCID: 0000-0002-1679-5456)

<sup>2</sup> Homi Bhabha National Institute, Anushaktinagar, Mumbai – 400 094

<sup>3</sup> Post Graduate and Research Department of Chemistry, Maharaja's College, Ernakulam, Kerala 682011, India; prasanthkumarkp@gmail.com (ORCID: 0000-0001-6769-6485)

<sup>4</sup> Group of Catalysis, Synthesis and Organic Green Chemistry, Department of Pharmaceutical Sciences, University of Perugia, Via del Liceo 1, 06123 Perugia Italy. F.Mar. Francesca.marini@unipg.it (ORCID: 0000-0003-0747-5060); C.S. claudio.santi@unipg.it (ORCID: 0000-0002-7698-8970)

<sup>5</sup> Department of Chemistry "Ugo Schiff", University of Florence, Via della Lastruccia 13, Sesto Fiorentino, I-50019 Florence, Italy; F.manfrancesca.mangiavacchi@unifi.it (ORCID: 0000-0001-5344-2310)

\*Correspondence: B.G.S: beenam@barc.gov.in; C.S. [claudio.santi@unipg.it](mailto:claudio.santi@unipg.it)

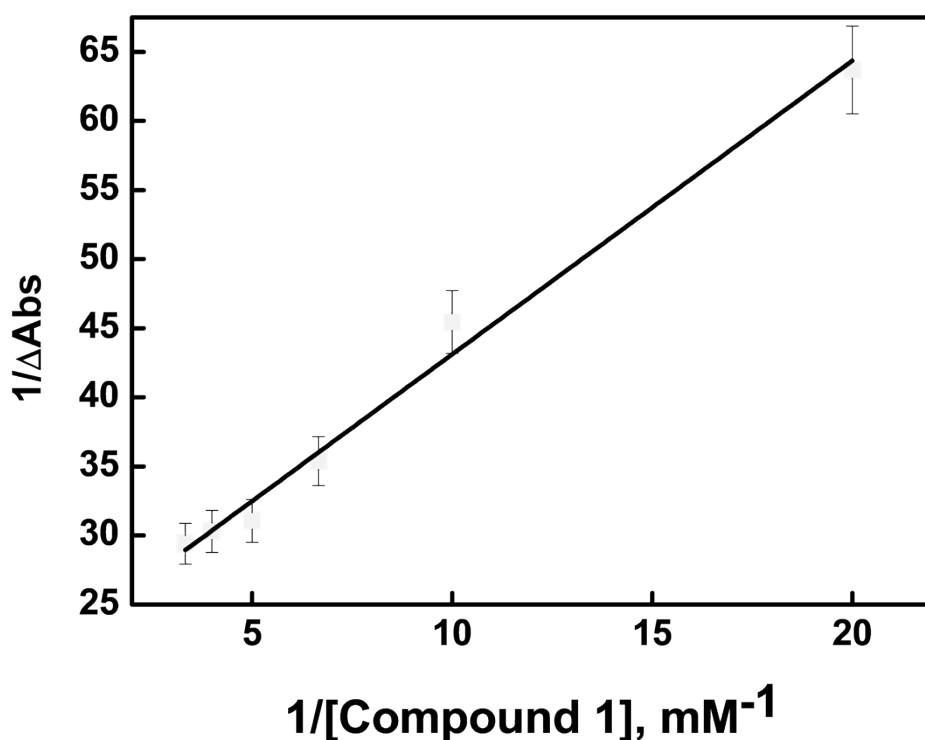

Figure S1: Double reciprocal plot of absorbance at 630 nm against varying concentration of compound 1 (50-300 μM). The plot was fitted in accordance to equation (4).

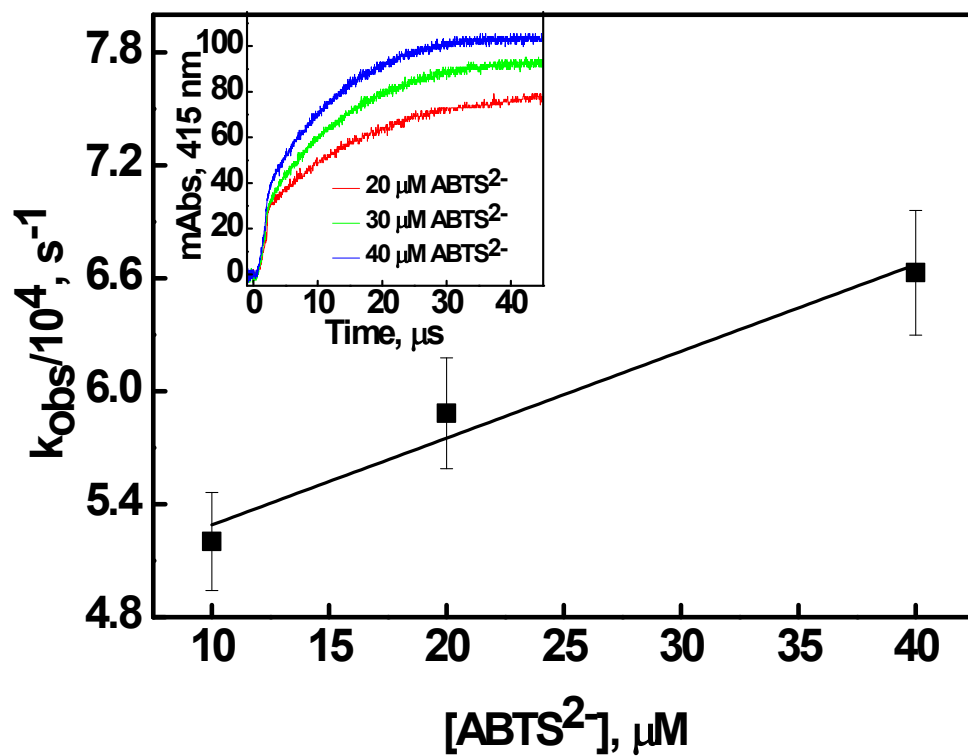

Figure S2: Plot showing the observed rate ( $k_{obs}$ ) for the electron transfer between  $ABTS^{2-}$  and the oxidizing transient derived from product of hydroxyl radical reaction with Compound **1**. Inset shows the absorbance–time plot at 415 nm obtained on pulse irradiating  $N_2O$ -saturated aqueous solutions at pH 7, containing 1 mM of compound **1** and 10–40  $\mu M$   $ABTS^{2-}$ .

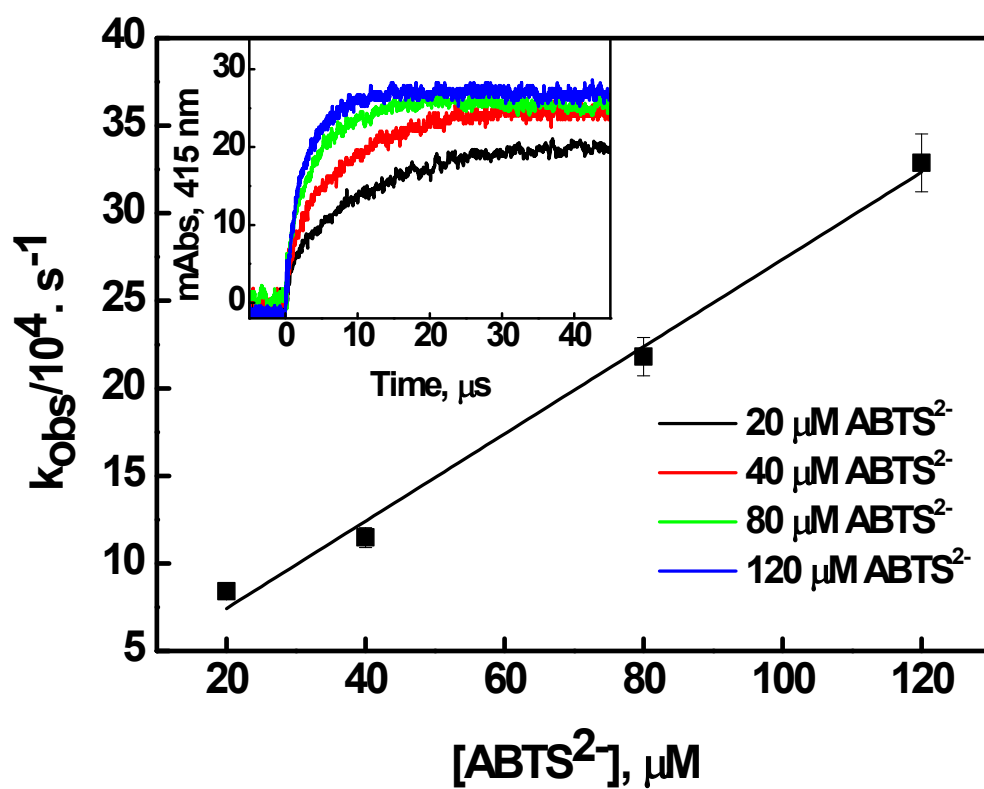

Figure S3: Plot showing the observed rate ( $k_{obs}$ ) for the electron transfer between  $\text{ABTS}^{2-}$  and the oxidizing transient derived from product of hydroxyl radical reaction with Compound **2**. Inset shows the absorbance –time plot at 415 nm obtained on pulse irradiating  $\text{N}_2\text{O}$ -saturated aqueous solutions at pH 7, containing 1 mM Compound **2** and 20-120  $\mu\text{M}$   $\text{ABTS}^{2-}$ .

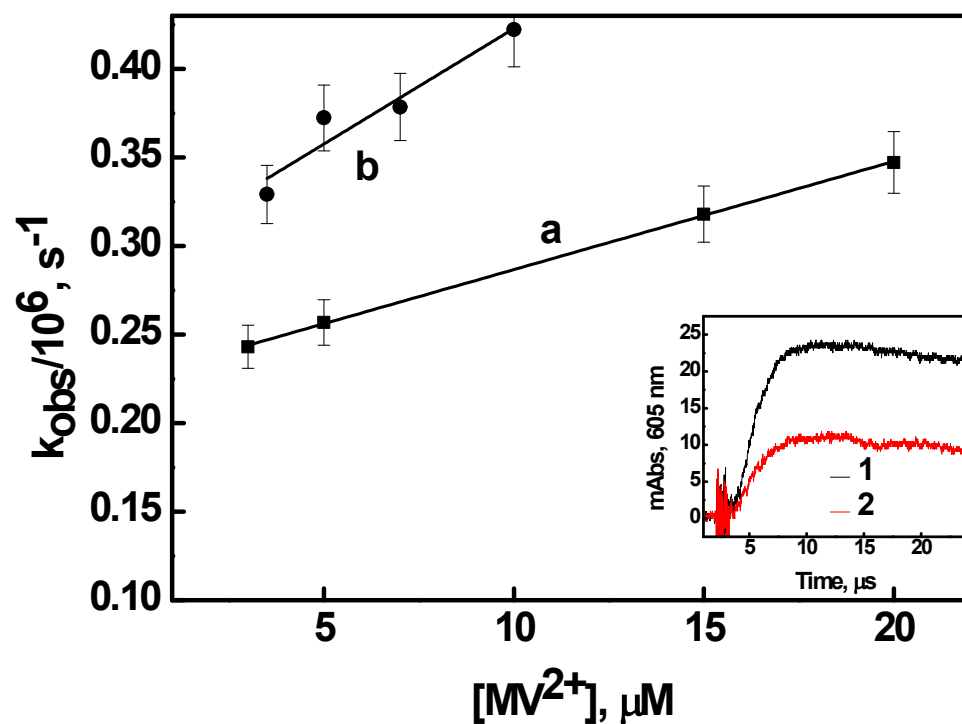

Figure S4: Plot showing the observed rate ( $k_{obs}$ ) for the electron transfer between  $MV^{2+}$  and the reducing transient derived from product of hydroxyl radical reaction with (a) Compound 1 and (b) Compound 2, respectively. Inset shows the absorbance –time plot at 605 nm obtained on pulse irradiating  $N_2O$ -saturated aqueous solutions at pH 7, containing 1 mM Compounds 1/2 and  $5 \mu M$   $MV^{2+}$ .

Cartesian coordinates and excerpt of thermochemical parameters of compound (1), radical cation (1•), sigma dimer (D<sub>1</sub>) and pi-dimer (D<sub>1</sub>').

Compound (1)

Charge = -1, Multiplicity = 1

|    |              |              |              |
|----|--------------|--------------|--------------|
| 6  | 3.916590000  | 1.760365000  | 0.184393000  |
| 6  | 2.643343000  | 1.215764000  | 0.033464000  |
| 6  | 2.484004000  | -0.167615000 | 0.022216000  |
| 6  | 3.597642000  | -0.998056000 | 0.159738000  |
| 6  | 4.862162000  | -0.444587000 | 0.308496000  |
| 6  | 5.027807000  | 0.937980000  | 0.322213000  |
| 1  | 4.033074000  | 2.835951000  | 0.193315000  |
| 1  | 1.794606000  | 1.875482000  | -0.072674000 |
| 1  | 3.474192000  | -2.073502000 | 0.150009000  |
| 1  | 5.719176000  | -1.096312000 | 0.413961000  |
| 1  | 6.013211000  | 1.367573000  | 0.439052000  |
| 6  | -0.409408000 | 0.532449000  | -0.323014000 |
| 6  | -1.843258000 | 0.047631000  | -0.473756000 |
| 1  | -0.289876000 | 1.128344000  | 0.578792000  |
| 1  | -0.096355000 | 1.107946000  | -1.191140000 |
| 6  | -2.799340000 | 1.228605000  | -0.635401000 |
| 1  | -1.926322000 | -0.606538000 | -1.344947000 |
| 1  | -2.126122000 | -0.539280000 | 0.403690000  |
| 1  | -2.711334000 | 1.891812000  | 0.226784000  |
| 1  | -2.513582000 | 1.804339000  | -1.518104000 |
| 34 | 0.778581000  | -1.025998000 | -0.176699000 |
| 6  | -4.248594000 | 0.768424000  | -0.785632000 |
| 1  | -4.897016000 | 1.636184000  | -0.928174000 |
| 1  | -4.352596000 | 0.123565000  | -1.657789000 |
| 6  | -4.759699000 | 0.027819000  | 0.445808000  |
| 8  | -5.330003000 | -1.085049000 | 0.277892000  |
| 8  | -4.597536000 | 0.582009000  | 1.567587000  |

Zero-point correction= 0.219157 (Hartree/Particle)

Thermal correction to Energy= 0.233403

Thermal correction to Enthalpy= 0.234347

Thermal correction to Gibbs Free Energy= 0.173076

Sum of electronic and zero-point Energies= -2978.965122

Sum of electronic and thermal Energies= -2978.950876

Sum of electronic and thermal Enthalpies= -2978.949932

Sum of electronic and thermal Free Energies= -2979.011202

-----

Monomer radical cation (1•)

Charge = 0, Multiplicity = 2

|   |             |             |             |
|---|-------------|-------------|-------------|
| 6 | 3.927294000 | 1.735559000 | 0.215634000 |
| 6 | 2.645581000 | 1.236990000 | 0.067902000 |

|    |              |              |              |
|----|--------------|--------------|--------------|
| 6  | 2.466132000  | -0.151843000 | 0.022928000  |
| 6  | 3.554938000  | -1.031664000 | 0.122156000  |
| 6  | 4.829034000  | -0.512819000 | 0.266759000  |
| 6  | 5.014717000  | 0.866976000  | 0.314496000  |
| 1  | 4.083209000  | 2.804262000  | 0.254224000  |
| 1  | 1.806958000  | 1.912620000  | -0.008532000 |
| 1  | 3.392045000  | -2.100299000 | 0.084140000  |
| 1  | 5.675690000  | -1.180024000 | 0.342081000  |
| 1  | 6.011462000  | 1.269572000  | 0.429078000  |
| 6  | -0.423326000 | 0.546400000  | -0.319210000 |
| 6  | -1.845522000 | 0.037423000  | -0.484550000 |
| 1  | -0.291986000 | 1.128634000  | 0.591636000  |
| 1  | -0.078889000 | 1.115254000  | -1.181793000 |
| 6  | -2.802278000 | 1.219540000  | -0.633630000 |
| 1  | -1.913925000 | -0.602284000 | -1.366220000 |
| 1  | -2.124970000 | -0.560557000 | 0.385168000  |
| 1  | -2.715440000 | 1.872179000  | 0.236317000  |
| 1  | -2.517700000 | 1.804282000  | -1.510382000 |
| 34 | 0.795860000  | -0.965905000 | -0.166355000 |
| 6  | -4.248002000 | 0.751599000  | -0.786579000 |
| 1  | -4.899785000 | 1.617836000  | -0.921727000 |
| 1  | -4.349577000 | 0.113724000  | -1.663953000 |
| 6  | -4.755024000 | -0.000561000 | 0.440216000  |
| 8  | -5.335559000 | -1.106062000 | 0.261738000  |
| 8  | -4.579137000 | 0.538560000  | 1.566926000  |

Zero-point correction= 0.219212 (Hartree/Particle)

Thermal correction to Energy= 0.233475

Thermal correction to Enthalpy= 0.234419

Thermal correction to Gibbs Free Energy= 0.173595

Sum of electronic and zero-point Energies= -2978.760079

Sum of electronic and thermal Energies= -2978.745815

Sum of electronic and thermal Enthalpies= -2978.744871

Sum of electronic and thermal Free Energies= -2978.805695

-----

Sigma dimer (**D<sub>1</sub>**)

Charge = -1, Multiplicity = 2

|   |             |              |              |
|---|-------------|--------------|--------------|
| 6 | 3.817856000 | -2.534165000 | 0.030855000  |
| 6 | 2.431547000 | -2.429151000 | 0.018942000  |
| 6 | 1.810781000 | -1.808365000 | -1.061784000 |
| 6 | 2.554591000 | -1.311935000 | -2.129992000 |
| 6 | 3.938648000 | -1.427348000 | -2.106015000 |
| 6 | 4.571695000 | -2.031777000 | -1.024380000 |
| 1 | 4.306927000 | -3.007790000 | 0.871154000  |
| 1 | 1.855831000 | -2.822055000 | 0.844431000  |
| 1 | 2.058411000 | -0.828902000 | -2.961435000 |
| 1 | 4.521273000 | -1.035907000 | -2.928593000 |

|    |              |              |              |
|----|--------------|--------------|--------------|
| 1  | 5.649989000  | -2.108840000 | -1.002792000 |
| 6  | -0.551215000 | -1.690596000 | 0.759291000  |
| 6  | -1.968097000 | -1.180137000 | 0.961208000  |
| 1  | -0.450900000 | -2.737547000 | 1.038431000  |
| 1  | 0.185060000  | -1.092703000 | 1.293629000  |
| 6  | -2.337271000 | -1.183997000 | 2.443635000  |
| 1  | -2.052409000 | -0.163369000 | 0.576475000  |
| 1  | -2.668949000 | -1.801975000 | 0.398897000  |
| 1  | -2.345684000 | -2.207569000 | 2.821856000  |
| 1  | -1.578283000 | -0.633779000 | 3.004537000  |
| 34 | -0.086554000 | -1.577068000 | -1.144176000 |
| 34 | 0.091521000  | 1.421649000  | -1.317992000 |
| 6  | -1.807888000 | 1.649729000  | -1.277158000 |
| 6  | -2.438815000 | 2.397924000  | -0.286882000 |
| 6  | -2.541968000 | 1.016881000  | -2.277882000 |
| 6  | -3.825725000 | 2.494581000  | -0.296404000 |
| 6  | -3.926858000 | 1.125105000  | -2.276451000 |
| 6  | -4.569998000 | 1.857582000  | -1.283724000 |
| 1  | -1.870010000 | 2.894778000  | 0.485791000  |
| 1  | -2.037982000 | 0.435356000  | -3.038550000 |
| 1  | -4.323459000 | 3.066814000  | 0.474591000  |
| 1  | -4.501651000 | 0.628034000  | -3.045778000 |
| 1  | -5.648852000 | 1.929370000  | -1.277699000 |
| 6  | 0.545727000  | 1.750094000  | 0.562321000  |
| 1  | 0.431363000  | 2.819916000  | 0.724838000  |
| 1  | -0.183436000 | 1.205045000  | 1.158834000  |
| 6  | 1.970153000  | 1.285117000  | 0.815125000  |
| 1  | 2.660087000  | 1.856602000  | 0.189315000  |
| 1  | 2.072733000  | 0.235214000  | 0.538757000  |
| 6  | 2.340300000  | 1.450217000  | 2.287899000  |
| 1  | 1.595458000  | 0.943181000  | 2.905484000  |
| 1  | 2.325309000  | 2.507402000  | 2.558503000  |
| 6  | 3.719090000  | 0.854553000  | 2.580080000  |
| 1  | 3.965792000  | 0.998291000  | 3.633757000  |
| 1  | 3.714777000  | -0.214659000 | 2.367617000  |
| 6  | 4.808737000  | 1.525087000  | 1.751423000  |
| 8  | 4.954300000  | 2.771450000  | 1.888211000  |
| 8  | 5.499182000  | 0.806712000  | 0.978374000  |
| 6  | -3.699054000 | -0.527662000 | 2.675270000  |
| 1  | -3.944689000 | -0.555527000 | 3.739002000  |
| 1  | -3.669623000 | 0.514677000  | 2.357327000  |
| 6  | -4.818090000 | -1.244442000 | 1.927670000  |
| 8  | -4.955738000 | -2.481654000 | 2.135597000  |
| 8  | -5.545350000 | -0.566955000 | 1.151202000  |

|                                 |                             |
|---------------------------------|-----------------------------|
| Zero-point correction=          | 0.440636 (Hartree/Particle) |
| Thermal correction to Energy=   | 0.470606                    |
| Thermal correction to Enthalpy= | 0.471550                    |

Thermal correction to Gibbs Free Energy= 0.372365  
Sum of electronic and zero-point Energies= -5957.748615  
Sum of electronic and thermal Energies= -5957.718645  
Sum of electronic and thermal Enthalpies= -5957.717701  
Sum of electronic and thermal Free Energies= -5957.816886

-----

Pi dimer ( $D_1'$ )

Charge = -1, Multiplicity = 2

|    |              |              |              |
|----|--------------|--------------|--------------|
| 6  | 0.231627000  | 3.420417000  | -2.209870000 |
| 6  | 0.392737000  | 2.041607000  | -2.225222000 |
| 6  | 1.086918000  | 1.419518000  | -1.185747000 |
| 6  | 1.620664000  | 2.165611000  | -0.136738000 |
| 6  | 1.456709000  | 3.545604000  | -0.138178000 |
| 6  | 0.762984000  | 4.174103000  | -1.167628000 |
| 1  | -0.307488000 | 3.904246000  | -3.012704000 |
| 1  | -0.015559000 | 1.450478000  | -3.034820000 |
| 1  | 2.157190000  | 1.694511000  | 0.673518000  |
| 1  | 1.869210000  | 4.128866000  | 0.673836000  |
| 1  | 0.636717000  | 5.248000000  | -1.157454000 |
| 6  | 2.267345000  | -0.912121000 | 0.296324000  |
| 6  | 3.755186000  | -0.668783000 | 0.097915000  |
| 1  | 1.845974000  | -0.344815000 | 1.123875000  |
| 1  | 2.051956000  | -1.967804000 | 0.451405000  |
| 6  | 4.515279000  | -0.973455000 | 1.388857000  |
| 1  | 4.117864000  | -1.307608000 | -0.709449000 |
| 1  | 3.937310000  | 0.366739000  | -0.195733000 |
| 1  | 4.191958000  | -0.277950000 | 2.166278000  |
| 1  | 4.268227000  | -1.979723000 | 1.730796000  |
| 34 | 1.219292000  | -0.477488000 | -1.295886000 |
| 34 | -1.268267000 | -1.009187000 | 0.245673000  |
| 6  | -1.244427000 | 0.683687000  | 1.123127000  |
| 6  | -1.810873000 | 1.842161000  | 0.596556000  |
| 6  | -0.590105000 | 0.706127000  | 2.356504000  |
| 6  | -1.721601000 | 3.026592000  | 1.317605000  |
| 6  | -0.503286000 | 1.898230000  | 3.063120000  |
| 6  | -1.068219000 | 3.059608000  | 2.545711000  |
| 1  | -2.318340000 | 1.836237000  | -0.355613000 |
| 1  | -0.155988000 | -0.200272000 | 2.758379000  |
| 1  | -2.160879000 | 3.927594000  | 0.911471000  |
| 1  | 0.003976000  | 1.916692000  | 4.017894000  |
| 1  | -1.000588000 | 3.986994000  | 3.097677000  |
| 6  | -2.268872000 | -0.707221000 | -1.418479000 |
| 1  | -2.100302000 | 0.321319000  | -1.727327000 |
| 1  | -1.756387000 | -1.368147000 | -2.114134000 |
| 6  | -3.740586000 | -1.068870000 | -1.293683000 |
| 1  | -3.826959000 | -2.103712000 | -0.955081000 |
| 1  | -4.160487000 | -1.026693000 | -2.302896000 |



|   |              |              |              |
|---|--------------|--------------|--------------|
| 6 | -4.543595000 | -0.151002000 | -0.378700000 |
| 1 | -4.489894000 | 0.872304000  | -0.755857000 |
| 1 | -4.109663000 | -0.149309000 | 0.622889000  |
| 6 | 6.022803000  | -0.851301000 | 1.196521000  |
| 1 | 6.285500000  | 0.143948000  | 0.837356000  |
| 1 | 6.532420000  | -0.995198000 | 2.153294000  |
| 6 | -6.004878000 | -0.582430000 | -0.301464000 |
| 1 | -6.566858000 | 0.120421000  | 0.319283000  |
| 1 | -6.457883000 | -0.578179000 | -1.292894000 |
| 6 | 6.613173000  | -1.885330000 | 0.241276000  |
| 8 | 7.593398000  | -1.527885000 | -0.469384000 |
| 8 | 6.117884000  | -3.044036000 | 0.237344000  |
| 6 | -6.202576000 | -1.961828000 | 0.321393000  |
| 8 | -5.502321000 | -2.263929000 | 1.325172000  |
| 8 | -7.079500000 | -2.713839000 | -0.187130000 |

Zero-point correction= 0.440315 (Hartree/Particle)

Thermal correction to Energy= 0.470157

Thermal correction to Enthalpy= 0.471101

Thermal correction to Gibbs Free Energy= 0.371949

Sum of electronic and zero-point Energies= -5957.751371

Sum of electronic and thermal Energies= -5957.721529

Sum of electronic and thermal Enthalpies= -5957.720585

Sum of electronic and thermal Free Energies= -5957.819737

-----
